# Supplementary material for: Novel Insights in the Potential of Halogenated Polyketide–Peptide Molecules as Lead Compounds in Cancer Drug Discovery
Source: MDPI journal article supplement (doi:10.3390/ijms24076208), 2023-03-25
Supplement: s1 [file s1]

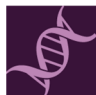

## *Supplementary material*

### **Novel Insights in the Potential of Halogenated Polyketide–Peptide Molecules as Lead Compounds in Cancer Drug Discovery**

#### **Table of Contents**

Figure S1. Smenamide A (**1**)

TableS1. NMR data for smenamide A (**1**) (700 MHz, CD<sub>3</sub>OD)

Figure S2. Positive ion mode high-resolution ESI MS spectrum of smenamide A (**1**)

Figure S3. Positive ion mode high-resolution ESI MS/MS spectrum of smenamide A (**1**)

Figure S4. Smenolactone D (**2**)

Table S2. NMR data for smenolactone D (**2**) (700 MHz, CD<sub>3</sub>OD)

Figure S5. Positive ion mode high-resolution ESI MS/MS spectrum of smenolactone D (**2**)

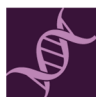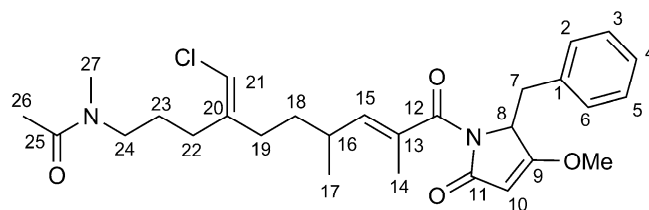

1

**Figure S1. Smenamide A (1):** Colorless amorphous solid, HRESIMS (positive ion mode, MeOH)  $m/z$  523.2326 ( $[M + Na]^+$ ,  $C_{28}H_{37}ClN_2O_4Na^+$ , calcd. 532.2334),  $m/z$  501.2509 ( $[M + Na]^+$ ,  $C_{28}H_{38}ClN_2O_4^+$ , calcd. 501.2515); MS isotope pattern: M (100%), M + 1 (32%, calcd. 31.5%), M + 2 (37%, calcd. 36.0%), M + 3 (10%, calcd. 10.6%); HRESIMS/MS (parent ion  $m/z$  523.23,  $C_{28}H_{37}ClN_2O_4Na^+$ ):  $m/z$  487.2557 ( $C_{28}H_{36}N_2O_4Na^+$ , calcd. 487.2567), 397.2092 ( $C_{21}H_{30}N_2O_4Na^+$ , calcd. 397.2098), 320.1384 ( $C_{16}H_{24}ClNO_2Na^+$ , calcd. 320.1388), 284.1618 ( $C_{16}H_{23}NO_2Na^+$ , calcd. 284.1621), 244.0941 ( $C_{12}H_{15}NO_3Na^+$ , calcd. 244.0944), 226.0836 ( $C_{12}H_{13}NO_2Na^+$ , calcd. 226.0838), 202.0472 ( $C_9H_9NO_3Na^+$ , calcd. 226.0475);  $^1H$  and  $^{13}C$  NMR: Table S1; UV (MeOH):  $\lambda_{max}(\epsilon)$  287 nm (8200), 246 nm (46000), 225 nm (92000); CD (MeOH):  $\lambda_{max}(\Delta\epsilon)$  238 (+33), 219 (−30).

| Position | <i>Z</i> -Conformer        |                         | <i>E</i> -Conformer        |                         | COSY              | HMBC           |
|----------|----------------------------|-------------------------|----------------------------|-------------------------|-------------------|----------------|
|          | $\delta_H$ [Mult., J (Hz)] | $\delta_C$ [Mult.]      | $\delta_H$ [Mult., J (Hz)] | $\delta_C$ [Mult.]      |                   |                |
| 1        | –                          | 135.6 (C)               | –                          | 135.6 (C)               |                   |                |
| 2/6      | 6.99 (m)                   | 130.8 (CH)              | 6.99 (m)                   | 130.8 (CH)              | 3/5               | 4              |
| 3/5      | 7.23 (ovl)                 | 129.4 (CH)              | 7.23 (ovl)                 | 129.4 (CH)              | 2/6               | 1              |
| 4        | 7.23 (ovl)                 | 128.3 (CH)              | 7.23 (ovl)                 | 128.3 (CH)              | 2/6               |                |
| 7        | a 3.37 (ovl)               | 34.8 (CH <sub>2</sub> ) | 3.37 (ovl)                 | 34.8 (CH <sub>2</sub> ) | 7b, 8             | 1, 2/6, 8, 9   |
|          | b 3.19 (m)                 |                         | 3.19 (m)                   |                         |                   |                |
| 8        | 5.02 (ovl)                 | 60.5 (CH)               | 5.02 (ovl)                 | 60.5 (CH)               | 7a, 7b            |                |
| 9        | –                          | 179.5 (C)               | –                          | 179.5 (C)               |                   |                |
| 10       | 5.04 (br. s)               | 95.5 (CH)               | 5.02 (br. s)               | 95.5 (CH)               |                   | 8, 11          |
| 11       | –                          | 170.7 (C)               | –                          | 170.7 (C)               |                   |                |
| 12       | –                          | 172.3 (C)               | –                          | 172.2 (C)               |                   |                |
| 13       | –                          | 132.1 (C)               | –                          | 132.1 (C)               |                   |                |
| 14       | 1.77 (d, 1.5)              | 13.7 (CH <sub>3</sub> ) | 1.78 (d, 1.5)              | 13.7 (CH <sub>3</sub> ) | 15                | 12, 13, 15     |
| 15       | 5.36 (br. d, 10.2)         | 144.1 (CH)              | 5.36 (br. d, 10.2)         | 144.1 (CH)              | 14, 16            |                |
| 16       | 2.45 (m)                   | 33.4 (CH)               | 2.48 (m)                   | 33.4 (CH)               | 15, 17, 18a       |                |
| 17       | 0.98 (d, 6.5)              | 20.4 (CH <sub>3</sub> ) | 1.00 (d, 6.5)              | 20.6 (CH <sub>3</sub> ) | 16                | 15, 18, 19     |
| 18       | a 1.51 (ovl)               | 36.1 (CH <sub>2</sub> ) | 1.52 (ovl)                 | 35.9 (CH <sub>2</sub> ) | 16, 19a, 19b      | 19             |
|          | b 1.28 (ovl)               |                         | 1.30 (ovl)                 |                         |                   |                |
| 19       | a 2.19 (ovl)               | 33.2 (CH <sub>2</sub> ) | 2.23 (ovl)                 | 33.2 (CH <sub>2</sub> ) | 18a, 18b, 19b, 21 | 20, 21         |
|          | b 2.06 (ovl)               |                         | 2.05 (ovl)                 |                         |                   |                |
| 20       | –                          | 143.1 (C)               | –                          | 142.8 (C)               |                   |                |
| 21       | 5.93 (br. s)               | 113.9 (CH)              | 5.97 (br. s)               | 114.1 (CH)              | 19a, 19b          | 20, 22         |
| 22       | a 2.22 (m)                 | 28.1 (CH <sub>2</sub> ) | 2.26 (m)                   | 28.0 (CH <sub>2</sub> ) | 22b, 23           | 20, 21         |
|          | b 2.15 (m)                 |                         | 2.18 (m)                   |                         |                   |                |
| 23       | 1.64 (m)                   | 25.9 (CH <sub>2</sub> ) | 1.70 (m)                   | 26.6 (CH <sub>2</sub> ) | 22a, 22b, 24      |                |
| 24       | 3.36 (ovl)                 | 48.6 (CH <sub>2</sub> ) | 3.33 (ovl)                 | 51.5 (CH <sub>2</sub> ) | 23                | 22, 23, 25, 27 |
| 25       | –                          | 172.9 (C)               | –                          | 172.7 (C)               |                   |                |



|     |          |                         |          |                         |    |        |
|-----|----------|-------------------------|----------|-------------------------|----|--------|
| 26  | 2.08 (s) | 21.7 (CH <sub>3</sub> ) | 2.07 (s) | 21.1 (CH <sub>3</sub> ) | 27 | 25     |
| 27  | 3.03 (s) | 36.6 (CH <sub>3</sub> ) | 2.88 (s) | 33.7 (CH <sub>3</sub> ) | 26 | 24, 25 |
| OMe | 3.97 (s) | 59.7 (CH <sub>3</sub> ) | 3.97 (s) | 59.7 (CH <sub>3</sub> ) |    | 9      |

**Table S1.** NMR data for smenamamide A (1) (700 MHz, CD<sub>3</sub>OD).

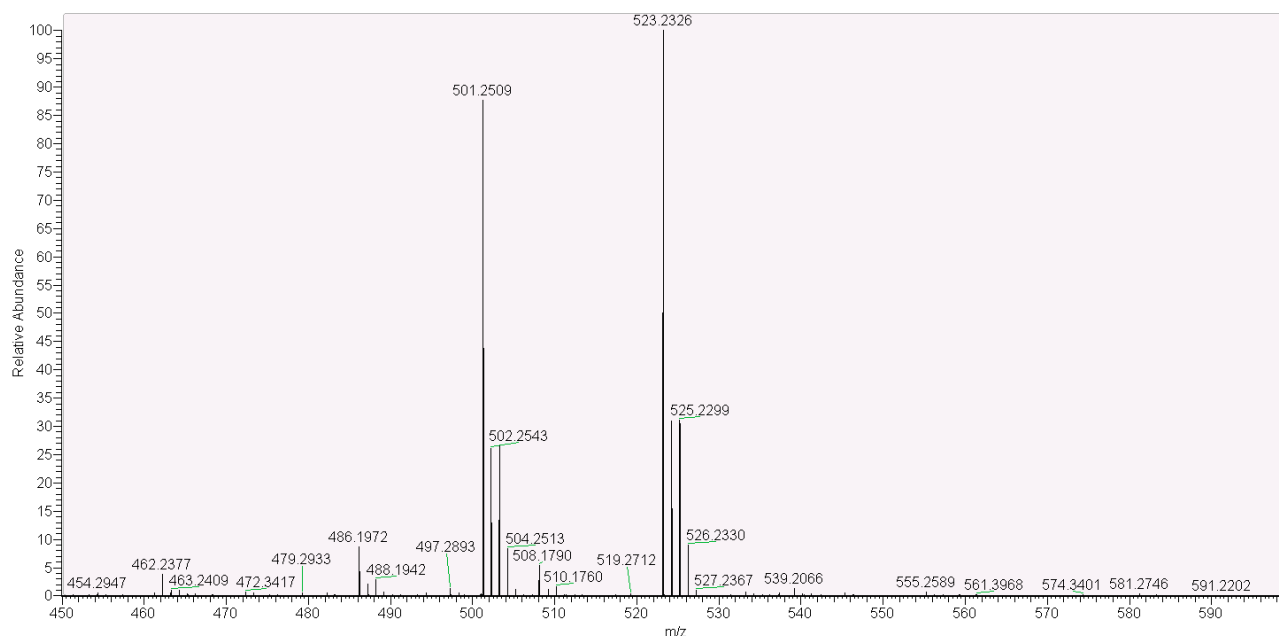

**Figure S2.** Positive ion mode high-resolution ESI MS spectrum of smenamamide A (1).

The positive ion mode high-resolution ESI mass spectrum of smenamamide A (1) displayed  $[M + H]^+$  and  $[M + Na]^+$  pseudomolecular ion peak at  $m/z$  501.2508 and 523.2326, respectively. Both ions showed intense (32%)  $M + 2$  isotope peaks, suggesting the presence of one atom of chlorine, and were indicative of the molecular formula  $C_{28}H_{37}ClN_2O_4$  (calcd. 501.2515 for  $C_{28}H_{38}ClN_2O_4$  and 523.2334 for  $C_{28}H_{37}ClN_2O_4Na$ ). The peak at  $m/z$  487.2557 ( $[M - HCl + Na]^+$ ) in the HRMS/MS spectrum confirmed the presence of chlorine in the molecule.

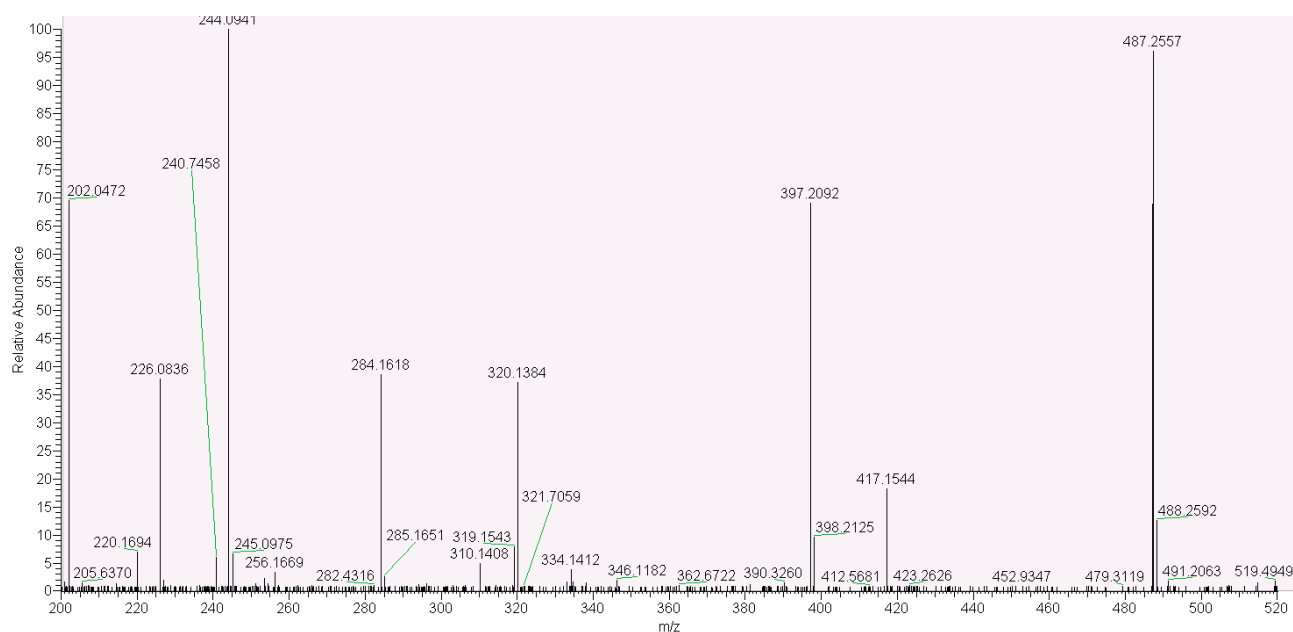

**Figure S3.** Positive ion mode high-resolution ESI MS/MS spectrum of smenamamide A (1), parent ion at  $m/z$  523.23.



Optical rotations were measured using a Jasco P-200 polarimeter. UV spectra were measured using a Beckman Coulter DU-800 spectrophotometer. ECD spectra were recorded on a Jasco J-715 spectrophotometer using a 1-mm cell. NMR spectra were determined on Varian Unity Inova spectrometers at 700 MHz; chemical shifts were referenced to the residual solvent signal (CD<sub>3</sub>OD:  $\delta_{\text{H}}$  3.31,  $\delta_{\text{C}}$  49.00).

High-resolution ESI-MS spectra were performed on a Thermo LTQ Orbitrap XL mass spectrometer. The spectra were recorded by infusion into the ESI source using MeOH as the solvent.

High performance liquid chromatography (HPLC) separations were achieved on a Varian Prostar 210 apparatus equipped with a Varian Prostar 325 UV-Vis detector.

The organic layer obtained from acid partition was subjected to reversed-phase HPLC separation on an RP-18 column [MeOH/H<sub>2</sub>O (8:2), Luna C18, 250 × 10 mm, 10  $\mu\text{m}$ ;  $\lambda$  = 280 nm], thus affording a fraction ( $t_{\text{R}}$  = 10 min) containing compound **1**. The fraction was then subjected to normal-phase HPLC on an SiO<sub>2</sub> column [*n*-Hex/*iso*-PrOH (8:2), Luna Silica, 250 × 4.6 mm, 5  $\mu\text{m}$ ;  $\lambda$  = 250 nm], which gave 15  $\mu\text{g}$  of pure compound **1**.

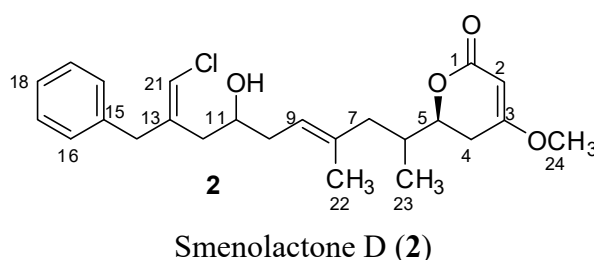

**Figure S4. Smenolactone D (2):** colorless oil; UV (ACN):  $\lambda_{\text{max}}$  ( $\epsilon$ ) 232 (13500); ECD (ACN):  $\lambda_{\text{max}}$  ( $\Delta\epsilon$ ) 248 ( $-12.8$ ); HRESIMS (positive ion mode, MeOH)  $m/z$  419.1980,  $[\text{M}+\text{H}]^+$  (calcd for C<sub>24</sub>H<sub>32</sub>ClO<sub>4</sub><sup>+</sup>, 419.1984,  $\Delta$   $-1.0$  ppm); <sup>1</sup>H and <sup>13</sup>C NMR (CD<sub>3</sub>OD) Table S2.

| Pos. | $\delta_{\text{C}}$ , type | $\delta_{\text{H}}$ , mult (J in Hz) | HMBC a            |
|------|----------------------------|--------------------------------------|-------------------|
| 1    | 170.9 (C)                  | -                                    |                   |
| 2    | 90.2 (CH)                  | 5.19 (d, 1.6)                        | 1,3,4             |
| 3    | 176.5 (C)                  | -                                    |                   |
| 4a   | 31.3 (CH <sub>2</sub> )    | 2.68 (ddd, 17.2, 13.2, 1.7)          | 2,3,4,5           |
| 4b   |                            | 2.30 (br. dd (17.2, 3.5)             | 2,4               |
| 5    | 80.4 (CH)                  | 4.35 (ddd, 13.1, 3.7, 3.7)           |                   |
| 6    | 35.4 (CH)                  | 1.93 (m)                             |                   |
| 7a   | 44.0 (CH <sub>2</sub> )    | 2.25 (m)                             | 6,8,9,23          |
| 7b   |                            | 1.93 (m)                             | 6,8,9             |
| 8    | 136.2 (C)                  |                                      |                   |
| 9    | 124.3 (CH)                 | 5.25 (br. t, 7.0)                    | 7,8,10,22         |
| 10a  | 37.2 (CH <sub>2</sub> )    | 2.19 (m)                             | 8,9,11,12         |
| 10b  |                            | 2.19 (m)                             |                   |
| 11   | 71.1 (CH)                  | 3.84 (m)                             |                   |
| 12a  | 38.1 (CH <sub>2</sub> )    | 2.33 (m)                             | 11,13,14,21       |
| 12b  |                            | 2.22 (m)                             | 11,13,14,21       |
| 13   | 142.1 (C)                  |                                      |                   |
| 14   | 42.6 (CH <sub>2</sub> )    | 3.48 (br. s)                         | 12,13,15,16/20,21 |
| 15   | 140.0 (C)                  |                                      |                   |

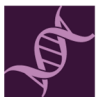

|       |                         |                   |          |
|-------|-------------------------|-------------------|----------|
| 16/20 | 130.1 (CH)              | 7.18 (br. d, 7.6) | 14,18    |
| 17/19 | 129.5 (CH)              | 7.29 (br. t, 7.6) | 15,19/17 |
| 18    | 127.7 (CH)              | 7.20 (br. t, 7.6) |          |
| 21    | 116.2 (CH)              | 6.04 (br. s)      | 12,13,14 |
| 22    | 16.1 (CH <sub>3</sub> ) | 1.61 (br. s)      | 7,8,9    |
| 23    | 14.9 (CH <sub>3</sub> ) | 0.92 (d, 6.8)     | 5,6,7    |
| 24    | 57.4 (CH <sub>3</sub> ) | 3.80 (s)          | 3        |

<sup>a</sup> HMBC correlations from proton stated to the indicated carbon.

**Table S2.** NMR data for smenolactone D (**2**) (700 MHz, CD<sub>3</sub>OD).

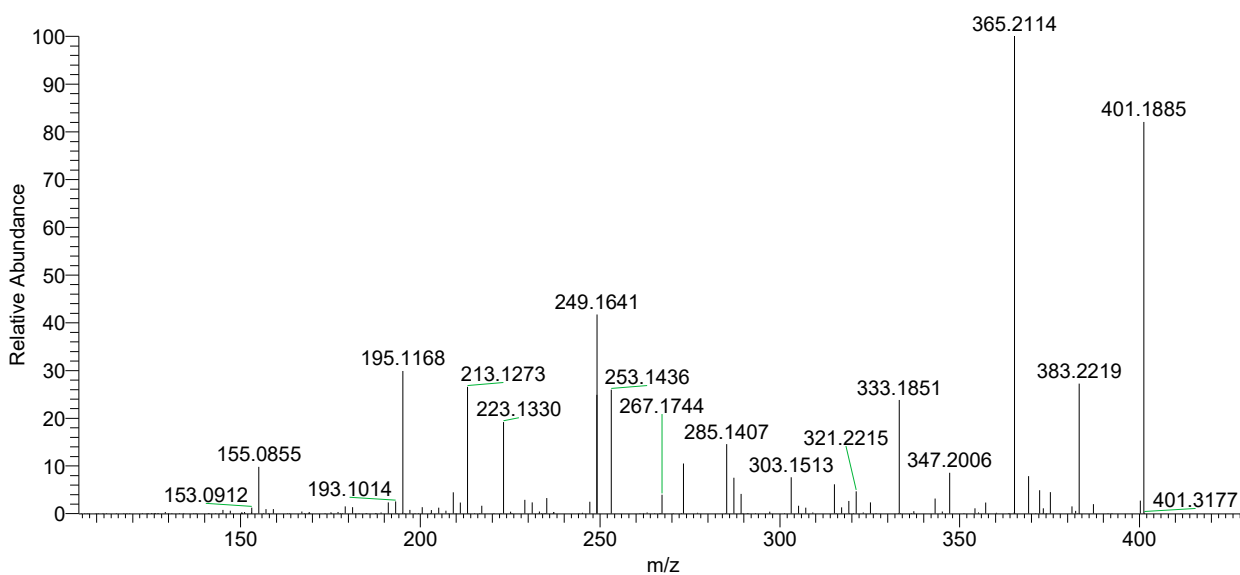

**Figure S5.** Positive ion mode high-resolution ESI MS/MS spectrum of smenolactone D (**2**), parent ion at  $m/z$  419.19.

High performance liquid chromatography (HPLC) separations were achieved on an Agilent 1260 Infinity Quaternary LC apparatus equipped with a Diode-Array Detector (DAD).

The organic layer, containing smenamides and smenolactones, was subjected to reversed-phase HPLC separation [column 250 × 10 mm, 10 μm, Luna (Phenomenex) C18; eluent A: H<sub>2</sub>O; eluent B: MeOH; gradient: 55→100% B, over 60 min, flow rate 5 mLmin<sup>-1</sup>], thus affording a fraction containing compounds **2** that was purified on reversed-phase HPLC [column 250 × 4.6 mm, 5 μm, Luna (Phenomenex) C18; eluent A: H<sub>2</sub>O; eluent B: ACN; gradient: 50→100% B, over 35 min, flow rate 1 mL min<sup>-1</sup>], giving smenolactone D (**2**) (93 μg,  $t_R$  = 18.2 min).
